# Supplementary material
Source: Springer Nature journal article supplement (https://www.springermedizin.de/resource/supplementary/12931_2012_1336_MOESM9_ESM.pdf/9426062)

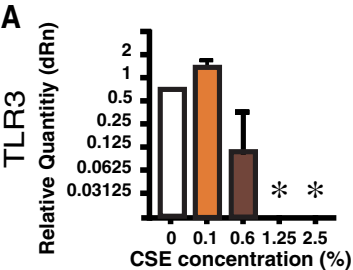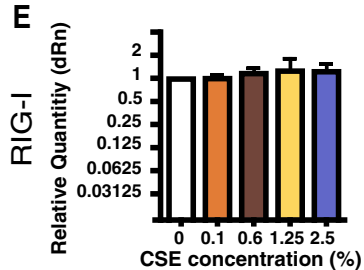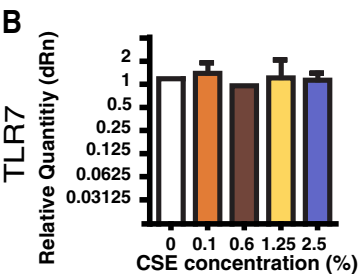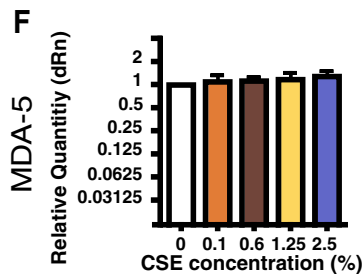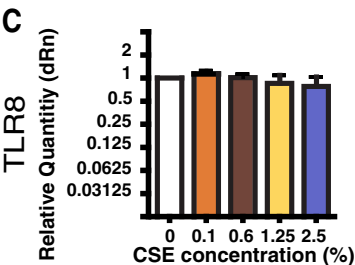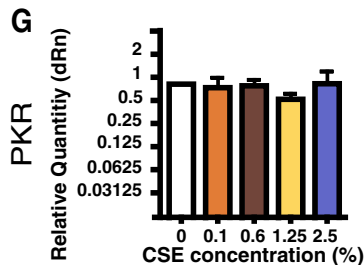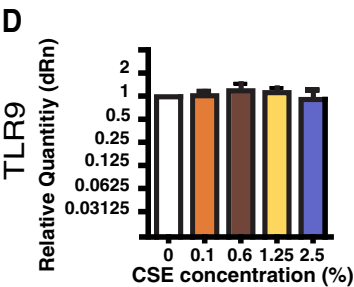

Supplement: MOESM9 [file 9426062]
